# Supplementary material
Source: publisher figshare collection journal article supplement (https://acs.figshare.com/ndownloader/files/4090864)
Supplement: Supplementary file 1 [file 4090864]

## **Supplementary Text S1**

# **The clinical trial protocol of Shaofu Zhuyu formula for treating primary dysmenorrheal**

**Organizer:** Nanjing University of Chinese Medicine

**Clinical trial operator:** Jiangsu Provincial Hospital of  
Integrated Traditional and Western Medicine

**Date:** 2010-10-8~2012-1-10

**Study designer:** Peijuan Wang

**Registration number:** ChiCTR-ONC-12002278

### Flowchart

| stage                          |                   | screening                      | Therapy(interview) |               |              | follow-up                       |
|--------------------------------|-------------------|--------------------------------|--------------------|---------------|--------------|---------------------------------|
| visit                          |                   | First visit                    | First period       | Second period | Third period | Fourth period                   |
|                                |                   |                                | First time         | Third time    | Fifth time   | Follow-up                       |
| days                           |                   | Seven days before menstruation | cramp              | cramp         | cramp        | Within 12 hours of menstruation |
| enrollment                     |                   | √                              |                    |               |              |                                 |
| Informed consent sign          |                   | √                              |                    |               |              |                                 |
| Formed medical record          |                   |                                | √                  | √             | √            | √                               |
| Distribute drugs               |                   |                                | √                  |               |              |                                 |
| <b>Lab chemical indicators</b> |                   |                                |                    |               |              |                                 |
| Diagnosis                      | type-B ultrasonic | √                              |                    |               |              |                                 |

|                     |                                                                    |   |   |   |   |  |
|---------------------|--------------------------------------------------------------------|---|---|---|---|--|
| indicators          | Physical examination                                               | √ |   |   |   |  |
|                     | electrocardiogram                                                  | √ |   |   |   |  |
| safety indicators   | routine blood test                                                 | √ |   |   |   |  |
|                     | routine urine test                                                 | √ |   |   |   |  |
|                     | ALT BUN Cr                                                         | √ |   |   | √ |  |
| Chemical indicators | 5-HT, OT, AVP, [S-LP(a)]                                           | √ | √ | √ | √ |  |
|                     | E <sub>2</sub> , P, FSH, T, GC                                     | √ | √ | √ | √ |  |
|                     | PGE <sub>2</sub> , PGF <sub>2α</sub> , NO, LTB <sub>4</sub> , ET-1 | √ | √ | √ | √ |  |

|                            |                                                                               |   |   |   |   |   |
|----------------------------|-------------------------------------------------------------------------------|---|---|---|---|---|
|                            | blood coagulation<br>function; blood<br>flow rheometer;<br>routine blood test | √ | √ | √ | √ |   |
| Efficacy<br>scores         | Pain scores                                                                   |   | √ | √ | √ | √ |
|                            | Pain scale scores                                                             |   | √ | √ | √ | √ |
|                            | Total symptom<br>severity score of<br>Chinese medicine                        |   | √ | √ | √ | √ |
| <b>Evaluation of trial</b> |                                                                               |   |   |   |   |   |
| Drug combination           |                                                                               |   | √ | √ | √ |   |
| Adverse event              |                                                                               |   | √ | √ | √ |   |

# The clinical protocol of Shaofu Zhuyu formula for treating primary dysmenorrhea

## 1. Background

Based on the theory of traditional Chinese medicine (TCM), i.e. the philosophy of treating the entire body as a whole, the multi-pathogenic factors of cold - coagulation, qi-stagnation, and blood-insufficiency are considered as the main reasons for PD. According to TCM theory, PD was divided into different disharmony patterns (may be considered as subtypes of disease in Western Medicine) such as the syndrome of cold coagulation and blood stasis (SCB), qi stagnation and blood stasis (SQB), etc.. The prevalence of PD with SCB is estimated to be about 60%.

The Chinese herbal formula, Shaofu Zhuyu (SFZY) decoction, is considered as an effective prescription in treating PD with SCB. This prescription originally came from “*Correction of Errors in Medical Classics*” compiled by Qing-ren Wang in Qing dynasty (A.D. 1830), and which was utilized in clinic to treat blood stasis syndrome of gynecology diseases such as dysmenorrhea, amenorrhea for about 200 years. The efficacy of SFZY decoction for treating PD with SCB was reported to be above 90%. The preparation of Shaofu Zhuyu Formula concentrate-granules (SFZYFG), a modified form of preparation of SFZY decoction, was approved by State Food and Drug Administration of China (SFDA).

The TCM formula that we used in our study was Shaofu Zhuyu Formula concentrated - granule (SFZYFG) produced by Jiangsu Tianjiang Pharmaceutical Co., Ltd. SFZYFG is composed of ten herbal concentrated - granule of *Angelicae sinensis*

Radix (No. 1008064), Chuanxiong Rhizoma (No. 1007151), Cinnamomi Cortex (No. 1005038), Foeniculi Fructus (No. 0908048), Zingiberis Rhizoma (No. 1007044), Myrrha (No. 1002085), Trogopteri Feces (No. 1005144), Typhae Pollen (No. 1003002), Paeoniae Radix Rubra (No. 1008034), and Corydalis Rhizoma (No. 1008073) in the herbs weight ratio of 3:1:2:1:0.5:2:1:3:1:1. Every herbal concentrate - granule was obtained by refluxing with water for 2 times and the combined filtrates were dried through spraying. In addition, the granule was prepared according to the approved preparation technology.

Our previous study on animals also suggested that SFZY decoction inhibited COX-2 enzyme and its expression in endometrial cell, regulated the ovarian function and hormone secretion, and improved the blood circulation. In this protocol, the study was conducted at Jiangsu Provincial Hospital of Integrated Traditional and Western Medicine, and which was complied with guidelines of Good Clinical Practice.

## **2. Objective**

Blood and urine samples were collected from each subject on the first day of menstrual cycle for continuous 4 periods.

By using metabolomics analysis in plasma and urine of PD patients after intake of SFZYFG, we aimed to: (i). to elucidate the metabolic profiling and phenotype changes between PD patients and healthy volunteers; (ii) to identify the potential biomarkers; and (iii) to explore the intervention effects and action mechanisms.

## **3. Study design methods**

Methods: own control

Sample size: 25

#### **4. Patient enrollment**

##### **4.1 Clinical diagnosis criteria of primary dysmenorrhea by Western medicine**

Dysmenorrhea, also known as painful menstruation, can be an incapacitating and disruptive condition. Clinically, primary dysmenorrhea (PD) is characterized by painful uterine cramping during the menstrual cycle or before and after menstruation, with no associated pelvic disease. The clinical features are listed as following:

1. PD is prevalent during adolescents and nonporous women.
2. Pain starts within several hours of the onset of menstruation and is most severe on the first day or two of menses.
3. Lower abdominal pain paroxysmal in a convulsive way or pain and tenesmus feeling, even radiation to the lumbosacral, anal, vaginal, and vastus medialis.
4. Some patients are pale, cold sweat, cold limbs and faint.

**Gynecological examination** (Rectal examination for unmarried women) :

without any organic pathology.

**B-ultrasound examination:**

without any organic pathology.

##### **4.2 Clinical diagnosis criteria of Primary dysmenorrhea with syndrome of cold coagulation and blood stasis by traditional Chinese medicine (State Administration of TCM approved)**

**Primary symptoms:** Cold and pain of abdomen, Pain reduction with the heat, or with distending pain to press.

**Minor symptoms:** scanty menstruation or bleeding obstacle, menstruation with red

dark and blood clot, fear of cold, hands and feet are cold, dripping with cold sweat, rectal dropped, nausea and vomiting, red dark tongue and white coat, deep pulse.

The PD patients must meet the all primary symptoms, and at least 2 items of minor symptoms combined tongue and pulse diagnosis.

#### 4.3 Assessment standard of symptoms in traditional Chinese medicine

| Observation indicators          | Grades                                                         | Scores   |
|---------------------------------|----------------------------------------------------------------|----------|
| Pain during the menstrual cycle | No pain                                                        | <b>0</b> |
|                                 | Mild: abdominal pain at fits and intervals, regular work       | <b>3</b> |
|                                 | Moderate: frequent abdominal pain, affect work partly          | <b>6</b> |
|                                 | Severe: abdominal pain duration, do not work a normal schedule | <b>9</b> |
| Duration time                   | No pain                                                        | <b>0</b> |
|                                 | Mild: abdominal pain last one day                              | <b>2</b> |
|                                 | Moderate: abdominal pain last two days                         | <b>4</b> |
|                                 | Severe: abdominal pain last three days                         | <b>6</b> |
|                                 | Every day added the score added 1                              |          |
| scanty menstruation             | No: period heavy and 5 sanitary towels every day               | <b>0</b> |
|                                 | Mild: heavy and 4 or 5 sanitary towels every day               | <b>1</b> |
|                                 | Moderate: 2 or 3 sanitary towels every day                     | <b>2</b> |
|                                 | Severe: period light and less than 1                           | <b>3</b> |



|                     |                                  |          |
|---------------------|----------------------------------|----------|
|                     | sanitary towels every day        |          |
| menstrual colour    | red                              | <b>0</b> |
|                     | purplish red                     | <b>1</b> |
|                     | dark red and some blood clots    | <b>2</b> |
|                     | darkness and many blood clots    | <b>3</b> |
| Cold limbs          | No                               | <b>0</b> |
|                     | Hands and feet not warm          | <b>1</b> |
|                     | Hands and feet cold              | <b>2</b> |
|                     | Hands and feet icy cold          | <b>3</b> |
| Fear of cold        | No                               | 0        |
|                     | fear the wind slightly           | 1        |
|                     | fear of cold but not add clothes | 2        |
|                     | fear of cold and add clothes     | 3        |
| Cold sweat          | No                               | 0        |
|                     | Yes                              | 1        |
| Anus pendent swells | No                               | 0        |
|                     | Yes                              | 1        |
| nausea and vomiting | No                               | 0        |
|                     | Yes                              | 1        |

#### 4.4 Clinical Efficacy Assessment standard of Primary Dysmenorrhea

| Symptoms                                                                   | Scores               |
|----------------------------------------------------------------------------|----------------------|
| abdominal pain during the menstrual cycle or before and after menstruation | Yes 5; No 0          |
| <b>abdominal pain obvious</b>                                              | Yes 5.5; No 0        |
| Abdominal pain is unbearable                                               | Yes 6; No 0          |
| Abdominal pain is unable to sit down or sleep at ease                      | Yes 1; No 0          |
| Abdominal pain effects of work and study                                   | Yes 1; No 0          |
| Abdominal pain and need bed rest                                           | Yes 1; No 0          |
| Using the general measures and relief the pain                             | Yes 0.5; No 0        |
| Using the general measures and afford no relief the pain                   | Yes 1; No 0          |
| pale                                                                       | Yes 0.5; No 0        |
| Cold sweat                                                                 | Yes 1; No 0          |
| Peripheral coldness                                                        | Yes 1; No 0          |
| shock                                                                      | Yes 2; No 0          |
| With the waist ache                                                        | Yes 0.5; No 0        |
| With the nausea and vomiting                                               | Yes 0.5; No 0        |
| With anal bulge                                                            | Yes 0.5; No 0        |
| Pain duration add one day the score add 0.5                                | Yes days × 0.5; No 0 |

Mild <10 scores; moderate 10~20 scores; severe ≥21scores

#### 4.5 Assessment of pain intensity

The visual analog scale (VAS) is a tool widely used to measure pain. Operationally a

VAS is usually a horizontal line, 10 cm in length, anchored by word descriptors at each end, as illustrated in Fig. 1. The patient marks on the line at the point that could represent their perception of their current state. The VAS score is determined by measuring in millimeters from the left hand end of the line to the point that the patient marks. The zero representing one extreme (e.g. no pain) and the 10 representing the other extreme (e.g. “ the worst pain possible”).

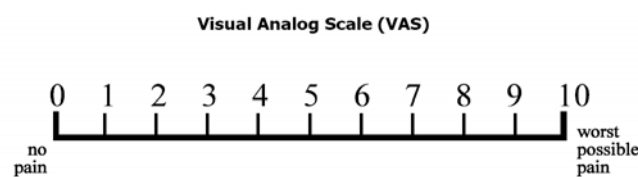

#### **4.6 Criteria for inclusion**

- (1) accord with the syndrome of cold coagulation and blood stasis (SCB);
- (2) dysmenorrhea in the last three periods with an average score higher than 4 on Visual-Analog Scale (VAS) for pain;
- (3) regular menstrual cycles for at least 3 months
- (4) age 18-40 years
- (5) no history of gynecologic disease
- (6) informed consent and voluntary participation

#### **4.7 Exclusion criteria**

Exclusion criteria for all patients were endometriosis, leiomyomata (fibroids), adenomyosis, pelvic inflammatory disease, and intrauterine device (IUD); age above 40 years; not belonging to the syndrome of cold coagulation and blood stasis; with cardiovascular, liver, kidney, hyperlipidemia, hypertension, or mental diseases through history or evaluation at the screening visit. The level of ALT is higher of

twice as much normal level. The levels of BUN and Cr are higher 20% than normal level. The WBC is under 5% than normal level.

#### **4.8 Rejection criteria**

The patients enrolled are rejected if they are misdiagnose or misenrolled or accord with the exclusion criteria or never oral administration of drugs or no medical records or drug combination.

#### **4.9 Shed off criteria**

The patients enrolled are considered as shed off cases if they are patients themselves withdraw; failed to be followed up; required withdraw because of severe adverse events, no compliance, and cause other disease.

### **5. Study design**

#### **5.1 Drug administration**

All patients were followed to monitor for four menstrual cycles and began receiving treatment with SFZYFG at the first day of the first period, twice daily (200 ml each time) for 5 days. In the second and third menstrual cycle, SFZYFG was administrated with the same dosage for 10 days (beginning 5 days before the menstruation).

#### **5.2 Samples collection**

Blood and urine samples were collected from each subject from 7 days before her expected menses and labeled as sample 1. Sample 2 (Pre-2) of blood and urine were collected on the first day of first menstrual cycle before administration of SFZYFG, respectively. Blood and urine collections on the first day of their second, third and

forth periods were labeled as sample 3, 4, and 5 (Post-3, 4, and 5), respectively. Blood for a metabolite profiling was drawn from an antecubital vein. The sodium citrate was adopted as anticoagulant. The twelve urine samples were obtained for metabolomics study after removing the all interfered by menstrual fluid.

## **5.2 Drug combination**

During the protocol carrying out, the drugs including chemicals and Chinese medicines related to curing PD were banned. But at the special conditions of diagnosis other diseases, e.g. stomachache, ranitidine would be used. If the patients are painful with VAS>7, the Ibuprofen capsule will be allowed to oral (1 capsule/time, twice a day). This situation must be record in medical cases and announced the disease, drugs, dosages, and usage.

## **6. Evaluation Indicators**

### **6.1 Diagnosis**

**Data of demography:** years, height, weight, nation, career

**General data:** history of present illness, allergic history, past history, drug combination

**Physical examination:** temperature, heart rate, breathing, blood pressure

**Gynaecology test** (rectal exam)

**B-ultrasonic**

### **6.2 Evaluation efficacy**

**pain intensity; Pain scores; Pain scale scores; Total symptom severity score of Chinese medicine**

### **6.3 Chemical indicators**

The therapeutic efficacy was evaluated with the levels of 5-hydroxytryptamine (5-HT), oxytocin (OT), arg<sup>8</sup>-Vasopressin (AVP), estradiol (E<sub>2</sub>), progesterone (P), follicle-stimulating hormone (FSH), testosterone (T), glucocorticoid (GC), prostaglandin E<sub>2</sub> (PGE<sub>2</sub>), prostaglandin F<sub>2α</sub> (PGF<sub>2α</sub>), leukotriene B<sub>4</sub> (LTB<sub>4</sub>), nitric Oxide (NO), endothelin-1 (ET-1), and lipoprotein (a) [S-LP(a)] in blood.

### **6.4 Assessment of Safety**

The examined indicators are routine blood test, routine urine test, ALT, BUN, Cr, and electrocardiogram.

Other adverse events and adverse reactions are recorded in medical cases.

## **7. Study Procedures**

### **7.1 Subject Recruitment and Screening (Visit 1)**

Also in this section, list any screening requirements such as laboratory or diagnostic testing necessary to meet any noted inclusion or exclusion criteria. The subjects interview for doctors 7 days before the menstruation will be recruited after the clinical trial had been fully explained to the patients, the written consent was obtained from all subjects. The blood and urine samples will be collected.

### **7.2 Visit 2**

On the first day of the first period the subjects followed up and administrated SFZYFG treatment after collecting the blood and urine samples. All patients were followed to monitor for four menstrual cycles and began receiving treatment with SFZYFG at the first day of the first period, twice daily (200 ml each time) for 5 days.

### **7.2 Visit 3**

Blood and urine samples were collected on the first day of the second period when the subjects followed up. The clinical medical cases were recorded.

### **7.2 Visit 4**

Blood and urine samples were collected on the third day of the second period when the subjects followed up. The clinical medical cases were recorded.

### **7.2 Visit 5**

Blood and urine samples were collected on the fourth day of the second period when the subjects followed up. The clinical medical cases were recorded. The symptoms and scores were recorded at this time. Filled the forms and evaluated the clinical efficacy.

## **8. Reporting and recording of adverse events**

An adverse event (AE) can be any unfavorable and unintended sign (including an abnormal laboratory finding), symptom, or disease temporally associated with the use of medicinal (investigational) product. The occurrence of an AE may come to the attention of study personnel during study visits and interviews of a study subject presenting for medical care, or upon review by a study monitor. During 24 hours, 7 days, and 14 days, these indicators will be retested.

If the unexpected adverse reactions are observed wide spread, the trial would be aborted by the Drug Regulatory Agency or Ethics Committee.

## **9. Reporting of Serious Adverse Events and Unanticipated Problems**

All serious adverse events, including therapy in hospital, prolong the time in

hospital, damaged, effect the live life, and threaten the life or resulted in congenital deformity, are required for reporting. And the participating investigators are treated urgently. Addition to this situation is required to report to ethical committee of the Jiangsu Provincial Hospital of Integrated Traditional and Western Medicine (+86 25 88929115) and Nanjing University of Chinese Medicine.

## **10. Ethical Considerations**

Ethnics committee and informed consent were important organization and method for guarantee the subject's right. Before the clinical trail, clinical trail plan must be discussed and passed by Ethnics committee. During the progress of the clinical trail, any modification of the clinical trial plan must be performed under the certification of ethnic committee.

The regulations require that the following information must be conveyed to each subject: a statement that the study involves research, an explanation of the purposes of the research and the expected duration of the subject's participation, a description of the procedures to be followed, and identification of any procedures which are experimental; a description of any reasonably foreseeable risks or discomforts to the subject; a description of any benefits to the subject or to others which may reasonably be expected from the research; a disclosure of appropriate alternative procedures or courses of treatment, if any, that might be advantageous to the subject; a statement describing the extent, if any, to which confidentiality of records identifying the subject will be maintained; for research involving more than minimal risk, an explanation as to whether any compensation and an explanation as to whether any medical treatments are available if injury occurs and,



if so, what they consist of, or where further information may be obtained; an explanation of whom to contact for answers to pertinent questions about the research and research subjects' rights, and whom to contact in the event of a research-related injury to the subject; and a statement that participation is voluntary, refusal to participate will involve no penalty or loss of benefits to which the subject is otherwise entitled, and the subject may discontinue participation at any time without penalty or loss of benefits to which the subject is otherwise entitled. Informed consent should be signed by subjects and be supplied by inquiry.

### **11. Study Monitoring Plan**

The anticipated plan and finished time

**Start time:** October, 2010.

**End time:** January, 2012.

**Clinical trial data collection, analysis time:** December, 2011.

### **12. Study Summary**

|                                              |  |
|----------------------------------------------|--|
| <b>Title</b>                                 |  |
| <b>Short Title</b>                           |  |
| <b>Protocol Number</b>                       |  |
| <b>Phase</b>                                 |  |
| <b>Methodology</b>                           |  |
| <b>Study Duration</b>                        |  |
| <b>Study Center(s)</b>                       |  |
| <b>Objectives</b>                            |  |
| <b>Number of Subjects</b>                    |  |
| <b>Diagnosis and Main Inclusion Criteria</b> |  |

|                                   |                        |  |
|-----------------------------------|------------------------|--|
| <b>Study Dose, Regimen</b>        | <b>Product, Route,</b> |  |
| <b>Duration of administration</b> |                        |  |
| <b>Reference therapy</b>          |                        |  |
| <b>Statistical Methodology</b>    |                        |  |

### 13. References

<http://www.sda.gov.cn/WS01/CL0053/24473.html>

<http://www.plosone.org/static/policies.action#reporting>

[http://www.nlm.nih.gov/bsd/uniform\\_requirements.html](http://www.nlm.nih.gov/bsd/uniform_requirements.html).

Draftsman: Peijuan Wang

Jiangsu Provincial Hospital of Integrated Traditional and Western  
Medicine

## Text S2 Assessment of pain intensity

The visual analog scale (VAS) is a tool widely used to measure pain. Operationally a VAS is usually a horizontal line, 10 cm in length, anchored by word descriptors at each end, as illustrated in Fig. 1. The patient marks on the line at the point that could represent their perception of their current state. The VAS score is determined by measuring in millimeters from the left hand end of the line to the point that the patient marks. The zero representing one extreme (e.g. no pain) and the 10 representing the other extreme (e.g. “the worst pain possible”).

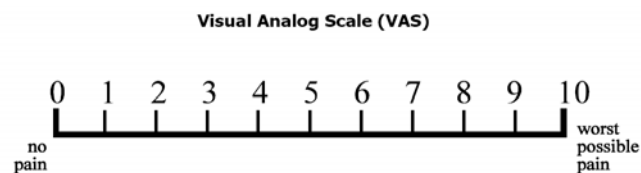

### **Text S3**

#### **Clinical diagnosis criteria of primary dysmenorrhea by Western medicine**

Dysmenorrhea, also known as painful menstruation, can be an incapacitating and disruptive condition. Clinically, primary dysmenorrhea (PD) is characterized by painful uterine cramping during the menstrual cycle or before and after menstruation, with no associated pelvic disease. The clinical features are listed as following:

1. PD is prevalent during adolescents and nonporous women.
2. Pain starts within several hours of the onset of menstruation and is most severe on the first day or two of menses.
3. Lower abdominal pain paroxysmal in a convulsive way or pain and tenesmus feeling, even radiation to the lumbosacral, anal, vaginal, and vastus medialis.
4. Some patients are pale, cold sweat, cold limbs and faint.

**Gynecological examination** (Rectal examination for unmarried women) :

without any organic pathology.

**B-ultrasound examination:**

without any organic pathology.

## **Text S4**

### **Clinical diagnosis criteria of Primary dysmenorrhea with syndrome of cold coagulation and blood stasis by traditional Chinese medicine**

**Primary symptoms:** Cold and pain of abdomen, Pain reduction with the heat, or with distending pain to press.

**Minor symptoms:** scanty menstruation or bleeding obstacle, menstruation with red dark and blood clot, fear of cold, hands and feet are cold, dripping with cold sweat, rectal dropped, nausea and vomiting, red dark tongue and white coat, deep pulse.

The PD patients must meet the all primary symptoms, and at least 2 items of minor symptoms combined tongue and pulse diagnosis.

**Text S5** The quality and quantity analysis of chemical components in SFZYFG.

Shaofu Zhuyu Formula concentrate-granule (SFZYFG), a Chinese herbal formula, was produced by Jiangsu Tianjiang Pharmaceutical Co., Ltd., and approved by State Food and Drug Administration of China. The quality of SFZYFG is conformed to “Provisional Regulations for Herbal Concentrate-Granule” (National Drug NOTE [2001] No. 325). The quality and quantity of chemical components in SFZYFG were analyzed by UPLC-MS. The results stated that the contents of paeoniflorin (**4**), albiflorin (**3**), ferulic acid (**10**), caffeic acid (**8**), vanillic acid (**2**), gallic acid (**9**), senkyunolide I (**1**), typhaneosid (**5**), isohamnetin-3-*O*-neohesperidoside (**6**), and isohamnetin-3-*O*-rutinosid (**7**) were 12.4%, 1.26%, 2.5%, 1.2%, 1.2%, 1.6%, 1.8%, 1.1%, 0.6%, 0.4%, respectively. The chemical structures of these compounds were listed in Figure.

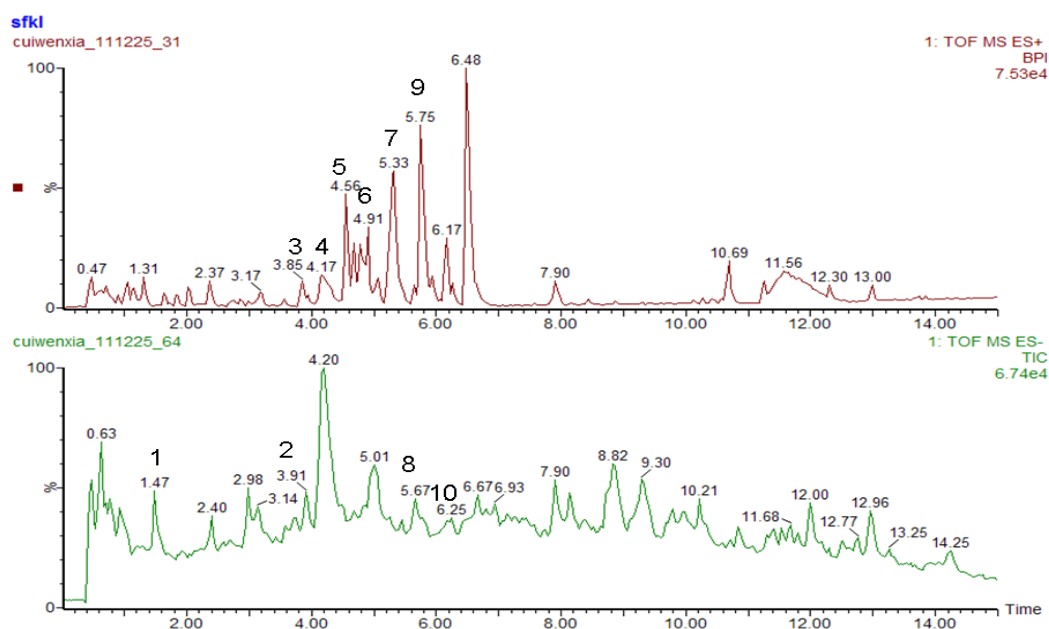

**UPLC-MS BPI chromatography of SFZYFG**

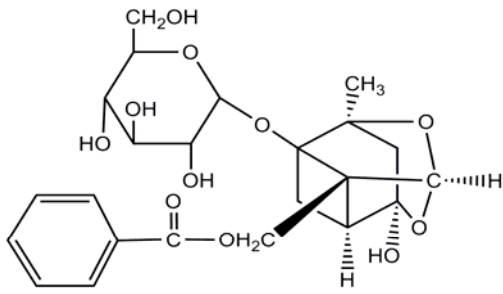

Paeoniflorin

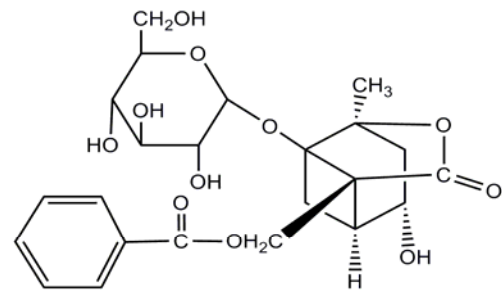

Albiflorin

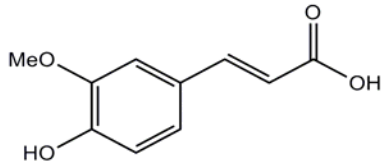

Vanillic acid

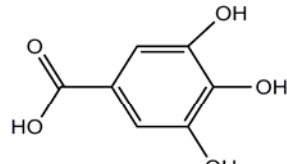

Gallic acid

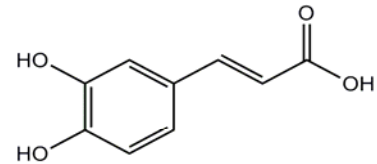

Ferulic acid

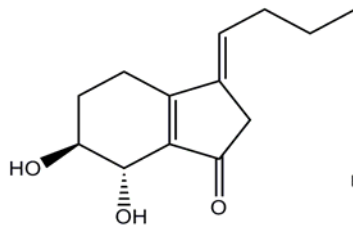

Senkyunolide I

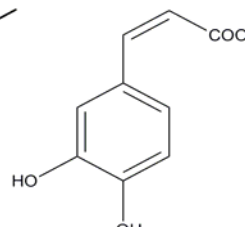

Caffeic acid

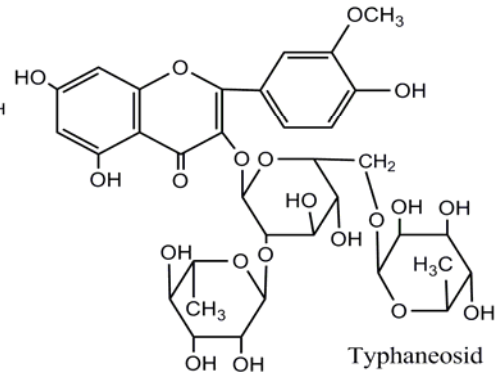

Typhaneosid

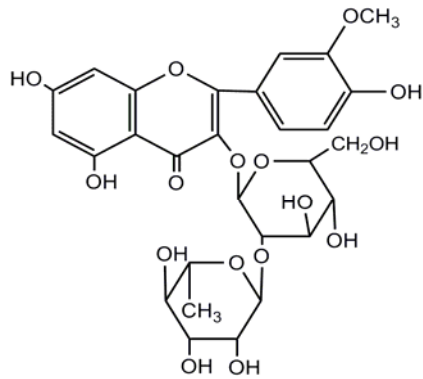

Isohamnetin-3-O-neohesperidoside

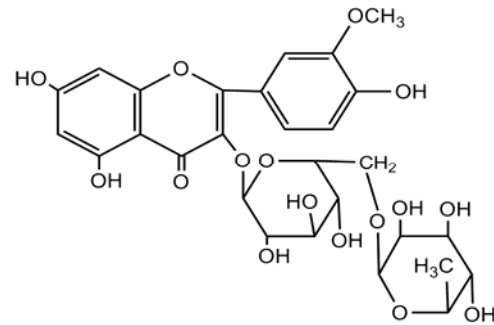

Isohamnetin-3-O-rutinosid

**The chemical structures of 10 compounds in SFZYFG**

### **Text S6 The test methods of clinical biochemical indicators**

Total fourteen clinical biochemical indicators were determined in serum of PD patients. The test methods of these indicators were according with the assay procedure of every kit. Bring all reagents to room temperature for at least 30 min prior to opening. All standards and samples should be run in duplicate.

Human Glucocorticoid Elisa kit (BG-HUM11096) was manufactured and distributed by Nova TeinBio, Inc. (Cambridge, MA). Arg<sup>8</sup>-Vasopressin EIA Kit (Catalog No. ADI-900-017, 96-well kit); Endothelin-1 EIA Kit (Catalog # ADI-900-020A, 96 well Enzyme Immunoassay kit for use with serum, plasma, and culture fluids); LTB<sub>4</sub> EIA Kit (Catalog No. ADI-900-068, 96=well kit); Serotonin EIA Kit (Catalog # ADI-900-175, 96-well Enzyme Immunoassay kit for use with serum, platelets, plasma, and urine); PGF<sub>2α</sub> EIA Kit (Catalog No. ADI-900-069, 96 well kit); Nitric Oxide (total), detection kit (Catalog No. ADI-917-020, 192 determinations); PGE<sub>2</sub> EIA Kit (Catalog No. ADI-900-001, 96-well kit); Oxytocin EIA Kit (Catalog No. ADI-900-153, 96-well kit).



## Supplementary Text S7

The mobile phase was composed of A (acetonitrile), and B (0.1% formic acid, v / v). For plasma analysis, the mobile phase with a linear gradient elution was employed: 0 ~ 0.5 min, A: 5%; 0.5 ~ 24 min, A: 5% ~ 100%; 24 ~ 28 min, A: 100%; 28 ~ 30 min, A: 100% ~ 5%. For urine analysis, the mobile phase with a linear gradient elution was employed: 0 ~ 2.5 min, A: 2%; 2.5 ~ 10 min, A: 10% ~ 20%; 10 ~ 11.5 min, A: 20 ~ 40%; 11.5 ~ 16 min, A: 40% ~ 80%; 16 ~ 18 min, A: 80% ~ 2%. The flow rate of the mobile phase was 0.4 mL / min, and the column temperature was maintained at 35 °C.

The instrument was operated by using an electrospray source in positive mode. The ionization source conditions were as follows: capillary voltage of 3.0 kV, source temperature of 120 °C and desolvation temperature of 350 °C. The sampling cone voltage was set at 30 V, extraction cone was 2.0 V (for plasma sample) or 0.7V (for urine sample), trap collision energy was 6.0 V, transfer collision energy 4.0 V, trap gas flow was 1.50 mL / min, ion energy was at 1.0 V. Nitrogen and argon were used as cone and collision gases, respectively. The cone and desolvation gas flow were 50 and 600 L / h, respectively. The scan time of 0.5 s (for plasma sample) or 0.2 s (for urine sample) and with interval scan time of 0.02 s was used throughout and with collision energy of 6 eV. The mass spectrometric data was collected from  $m/z$  100 to 1000 in centroid mode. Leucine-enkephalin was used as the lock mass generating an  $[M+H]^+$  ion ( $m / z$  556.2771) and  $[M-H]^-$  ion ( $m / z$  554.2615) at a concentration of 200 pg / mL and flow rate of 100  $\mu$ L / min. Dynamic range enhancement was applied throughout the MS experiment to ensure accurate mass measurement over a wider

dynamic range.

Chromatographic condition of QqQ/MS analysis is the same as UPLC-Q-TOF/MS performed. Mass spectrometry detection was performed on a Xevo Triple Quadrupole MS (Waters Corp., Milford, MA) equipped with an electrospray ionization source (ESI). ESI-MS spectra were acquired in positive ion multiple reaction monitoring (MRM) mode. The conditions of MS analysis were designed as follows: capillary voltage at 2 kV; the desolvation gas flow rate was set to 1,000 L/h at a temperature of 550 °C; the cone gas flow rate was set at 50 L/h and the source temperature at 150 °C. The cone voltage (CV) and collision energy (CE) were set depending upon each specific MRM for each biomarker.

**Figure S1** Flow diagram showing the progress of subjects at each stage of the clinical trial

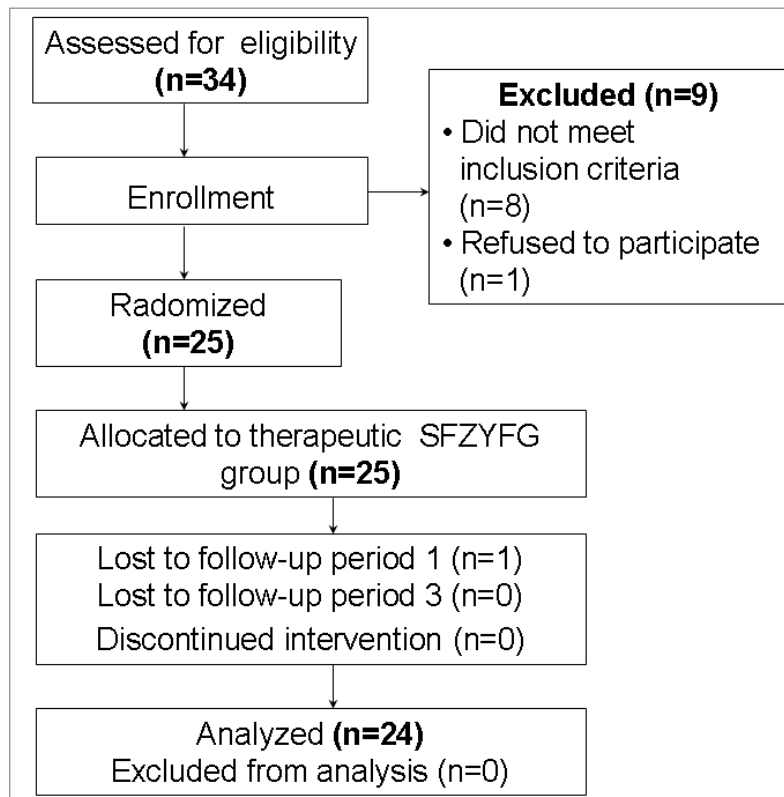

Figure S2 MS spectrum of 24 SFZYFG-regulated promising biomarker

candidates

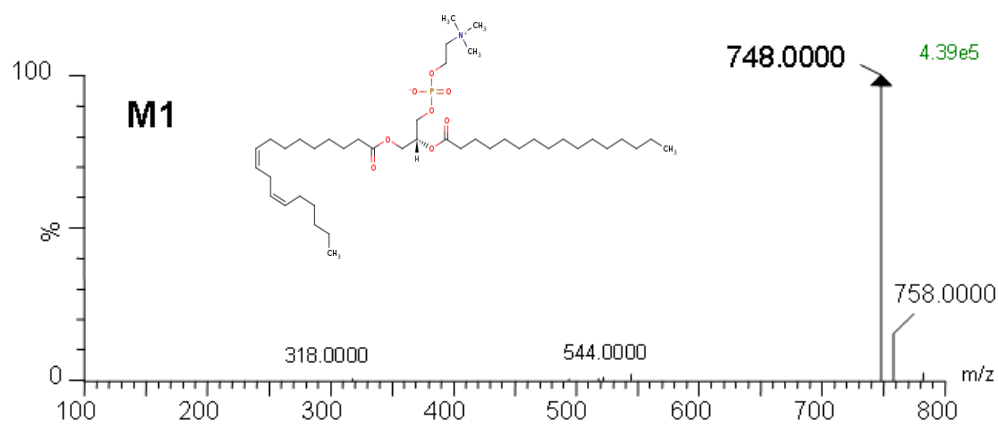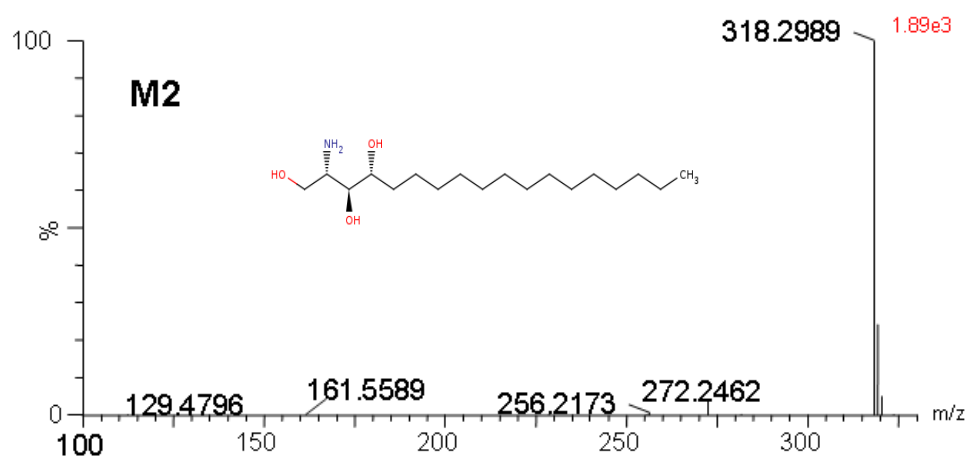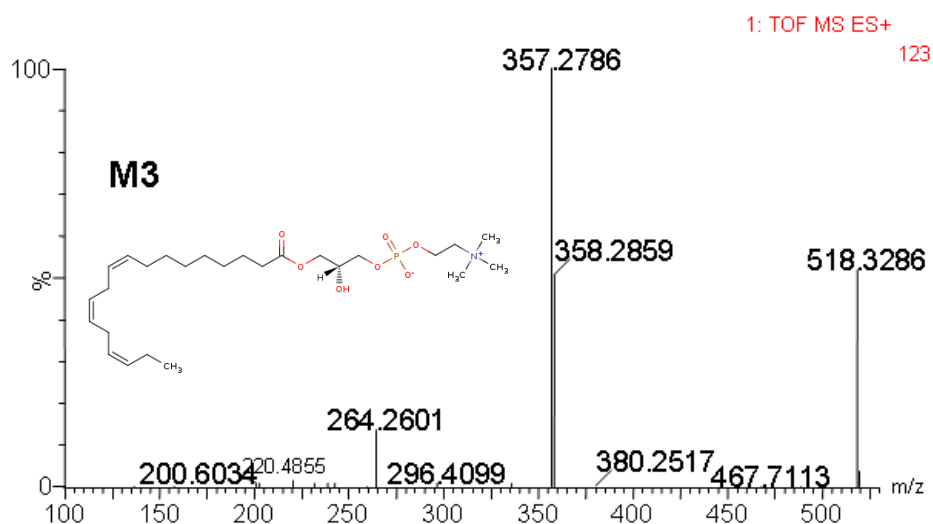

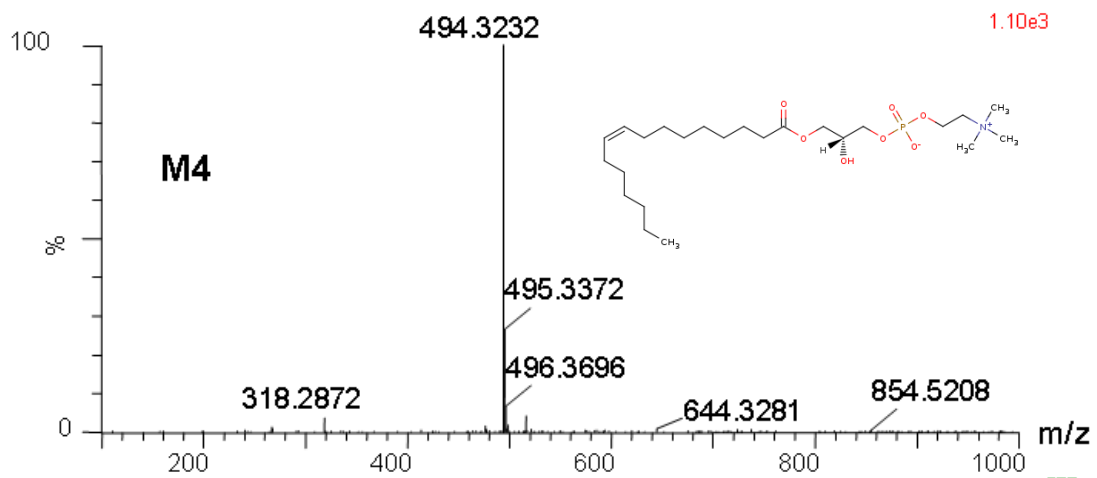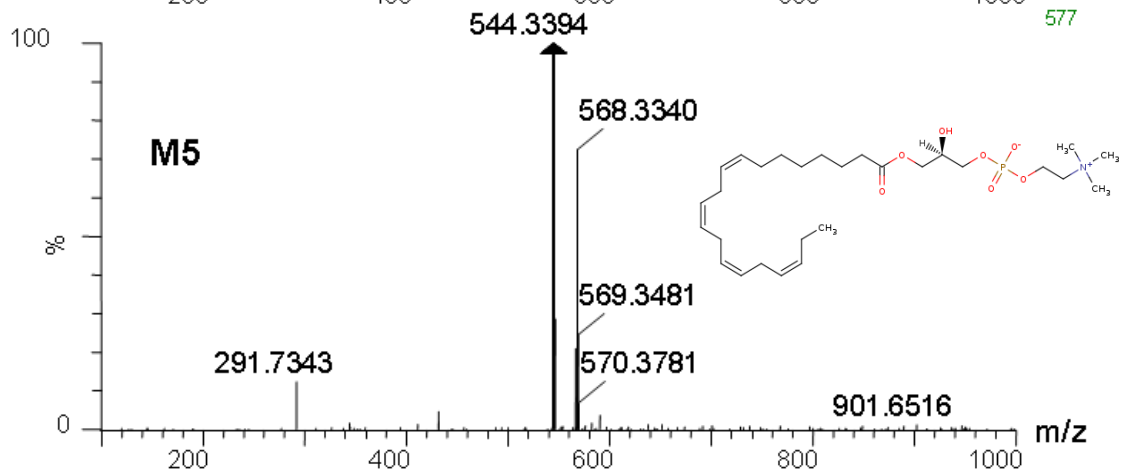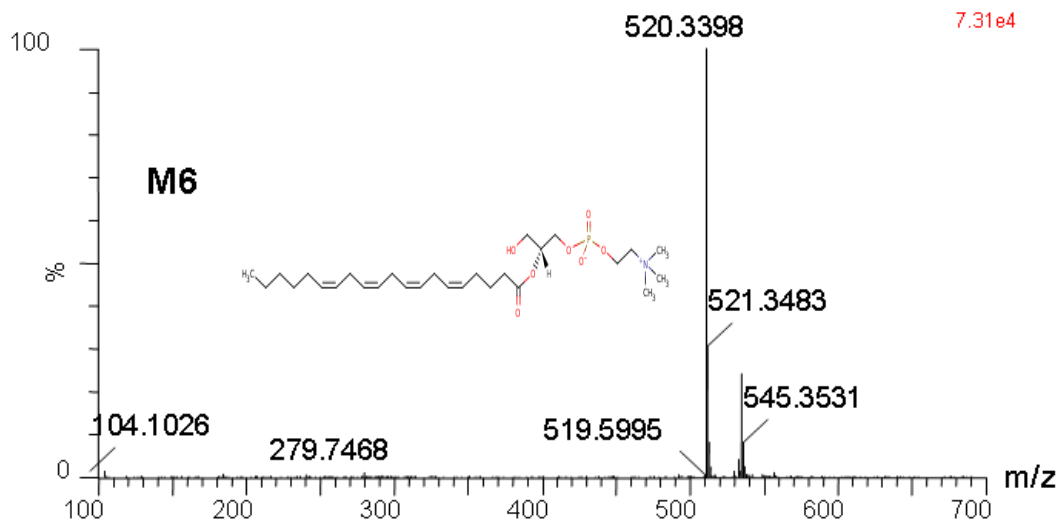

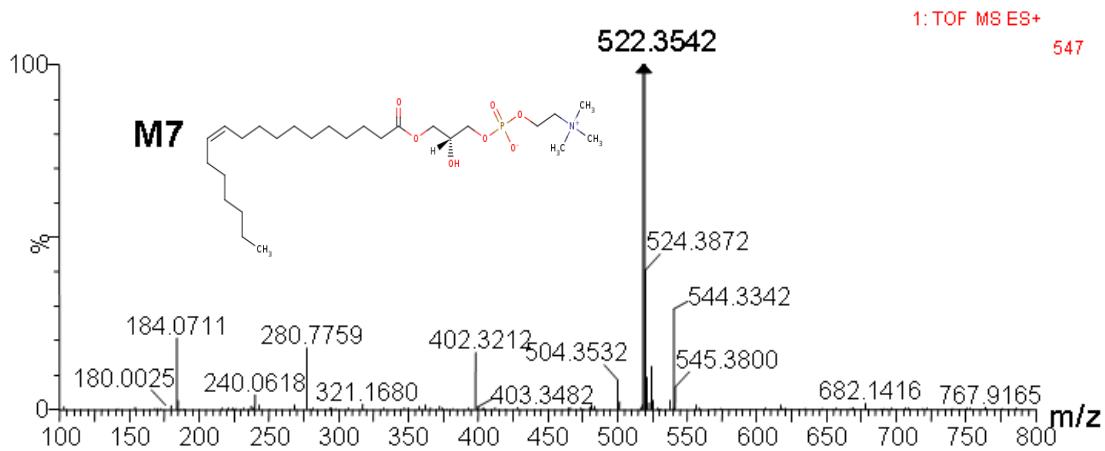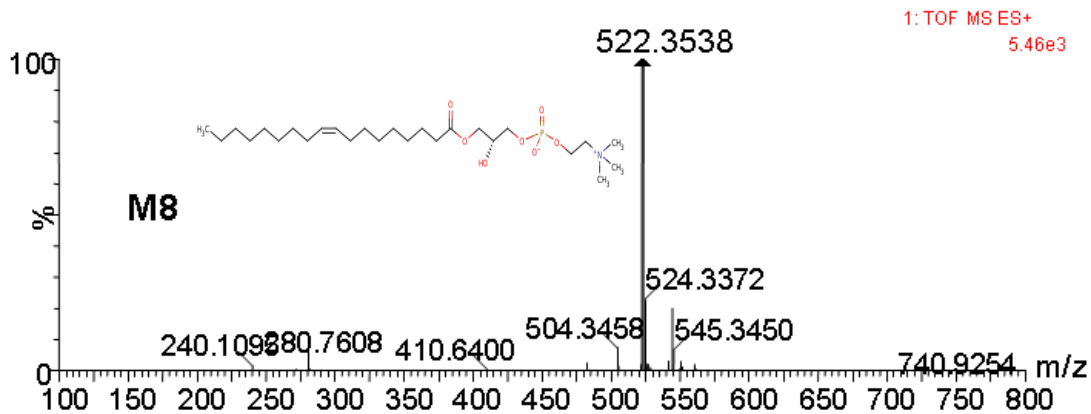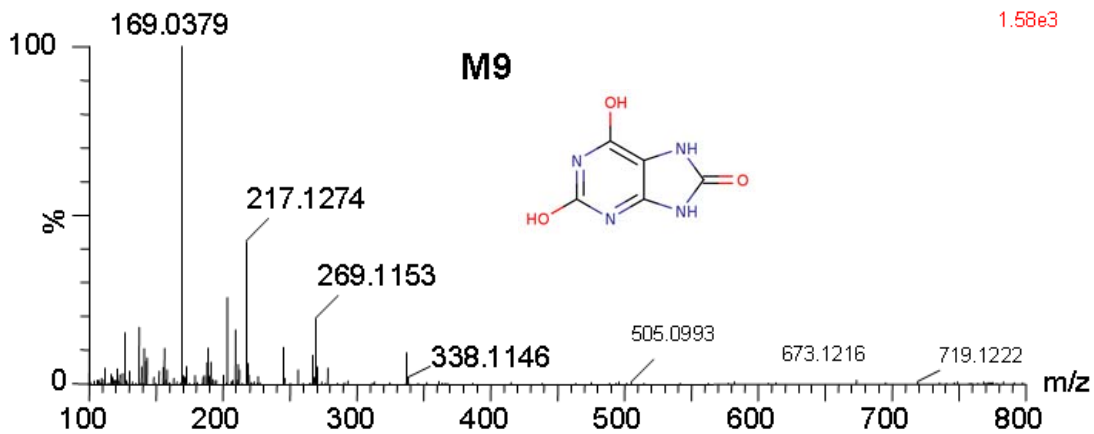

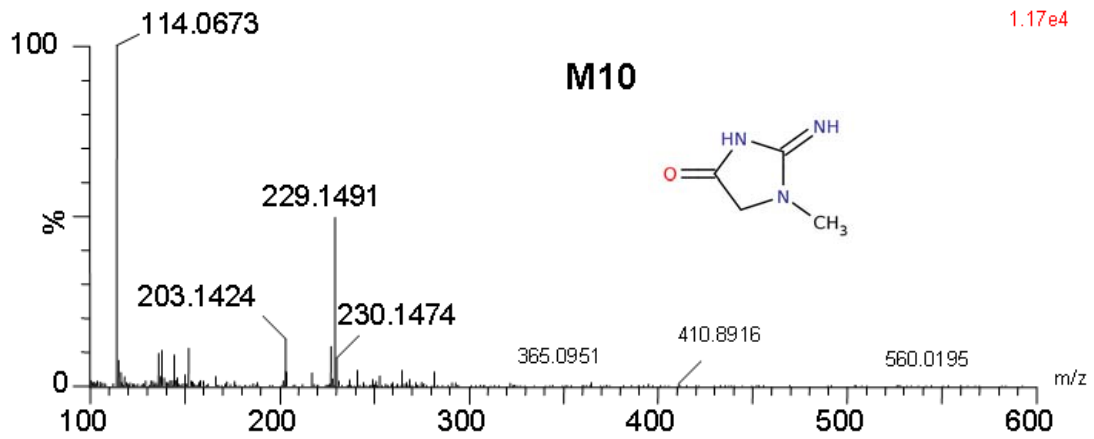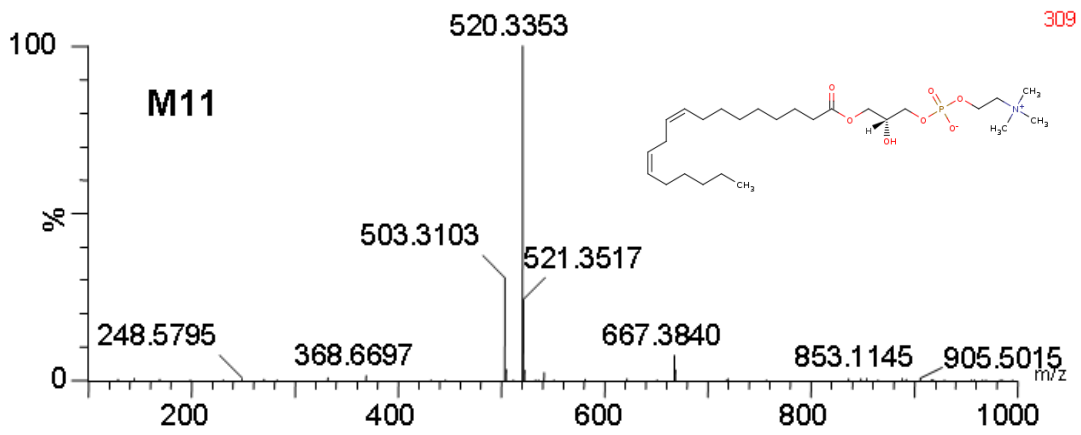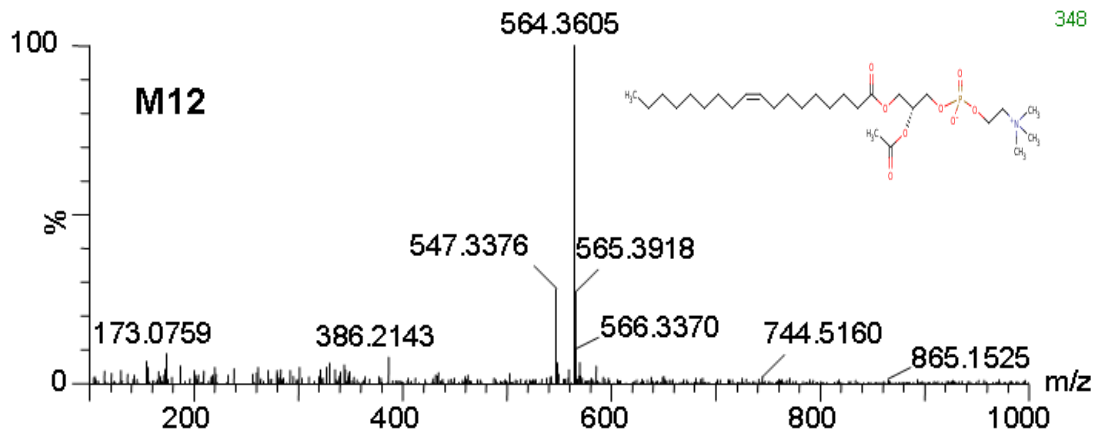

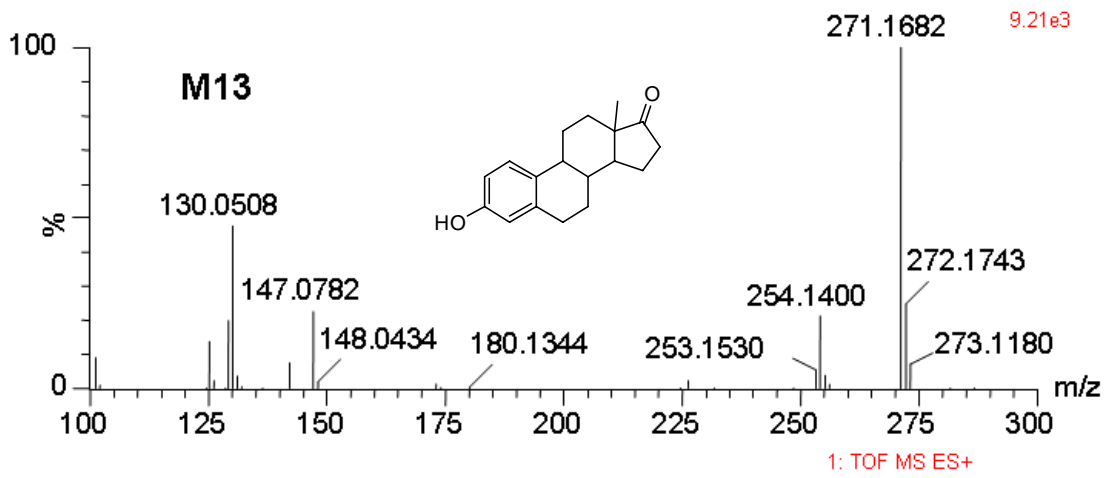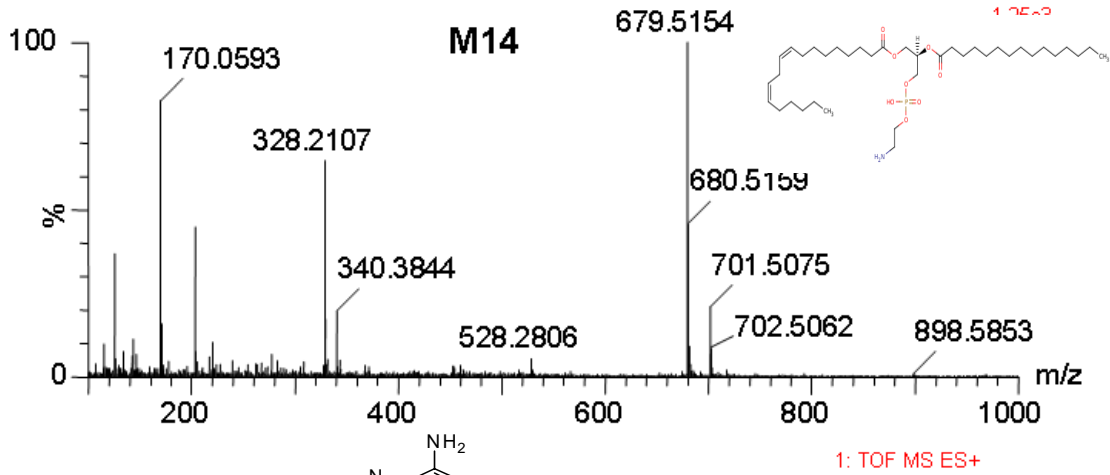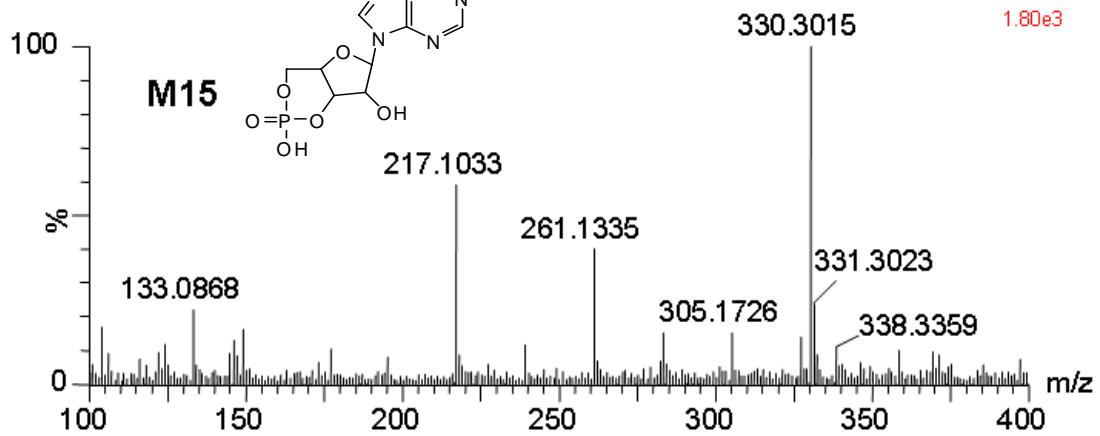



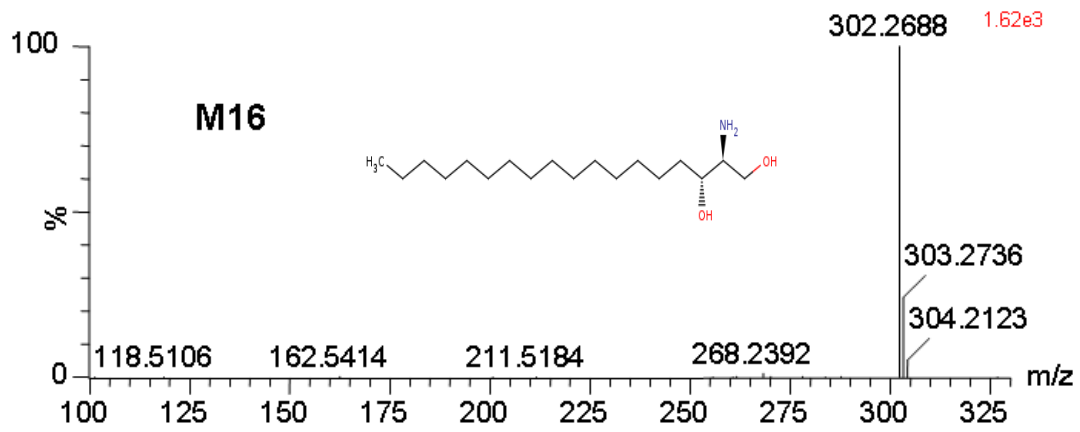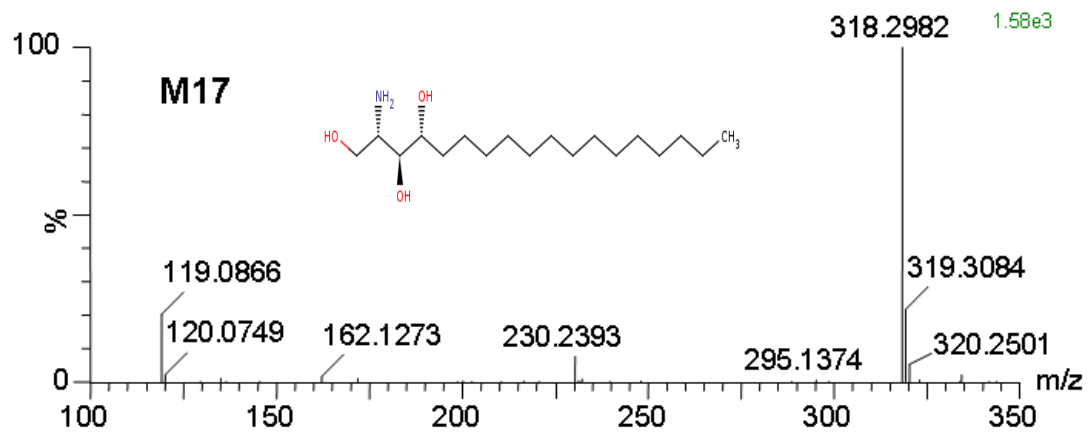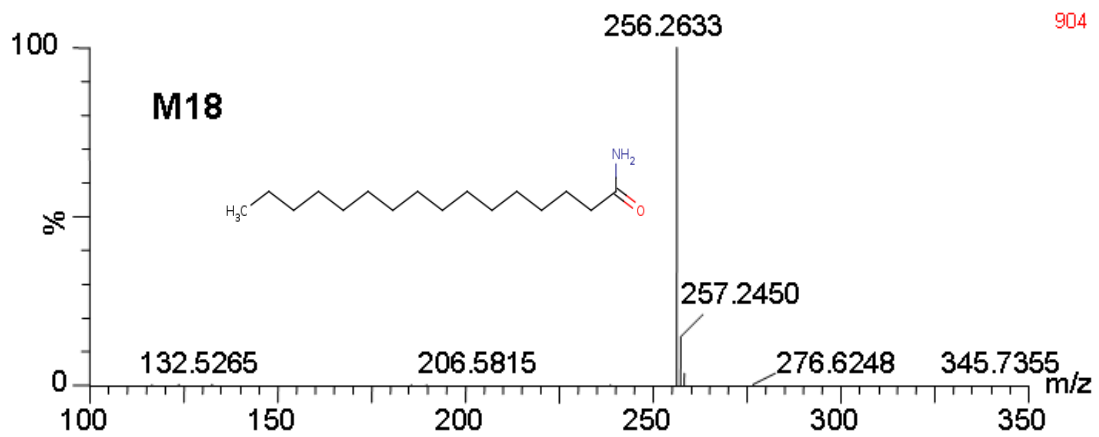

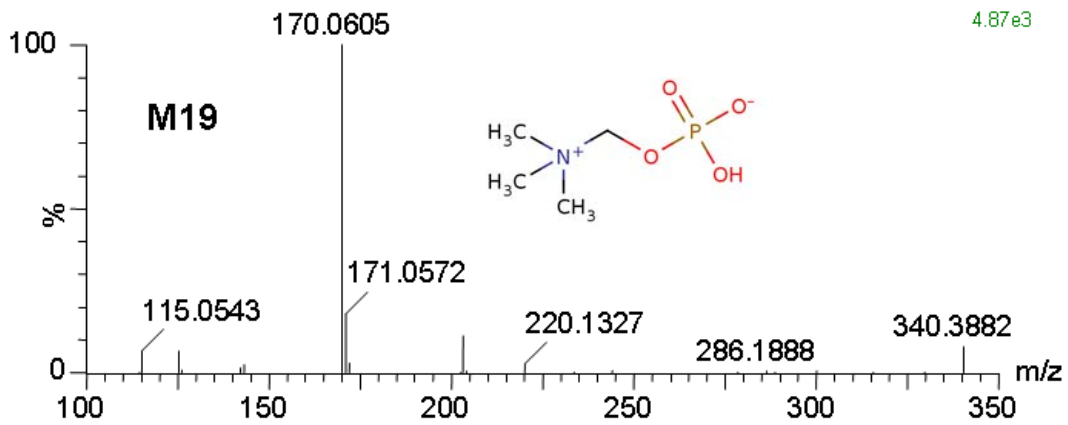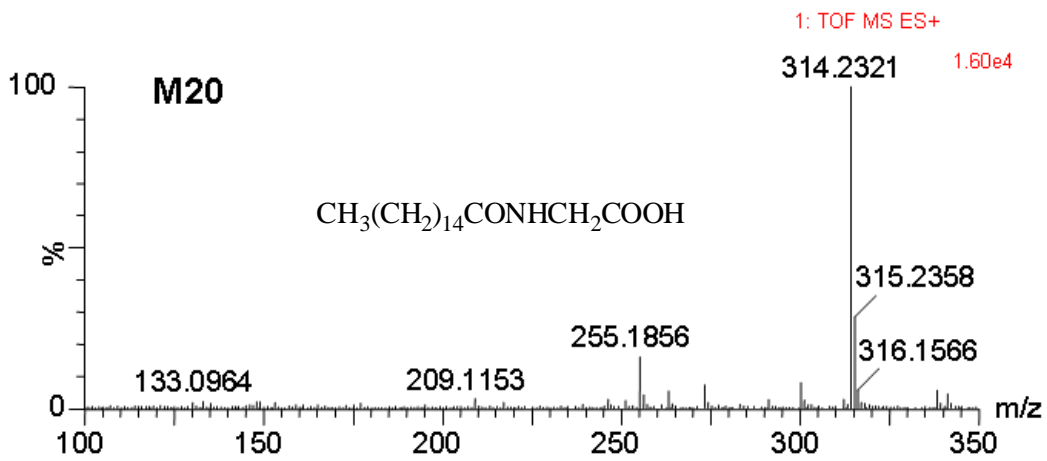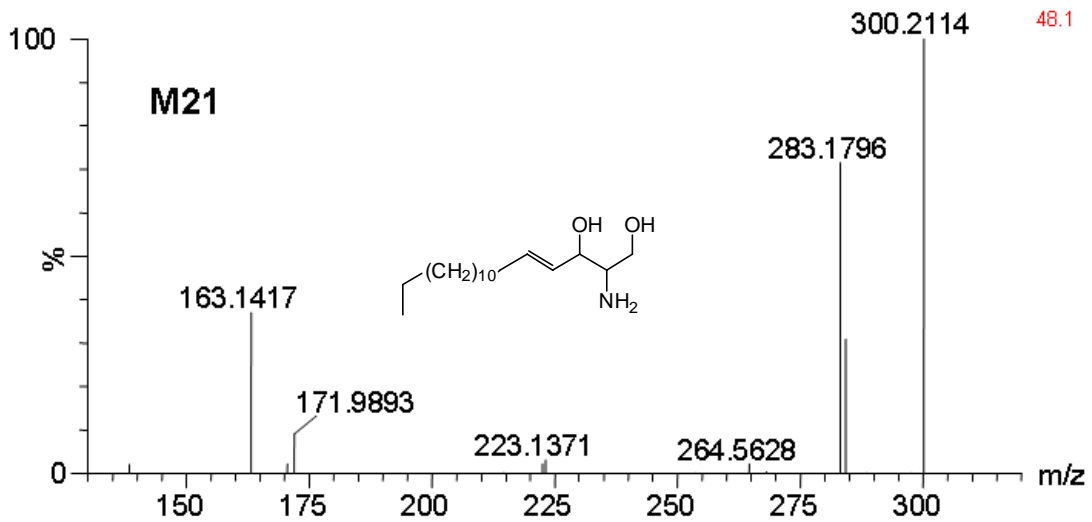

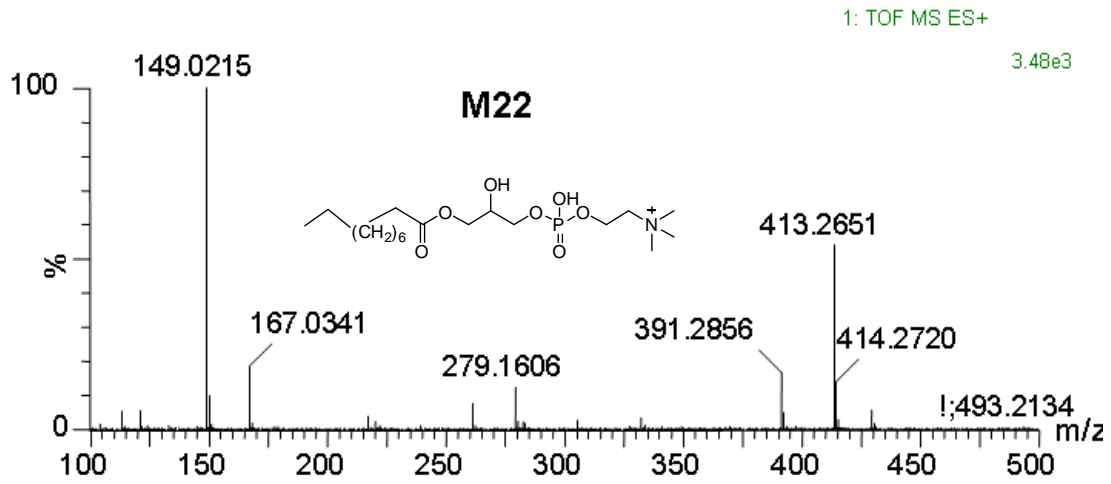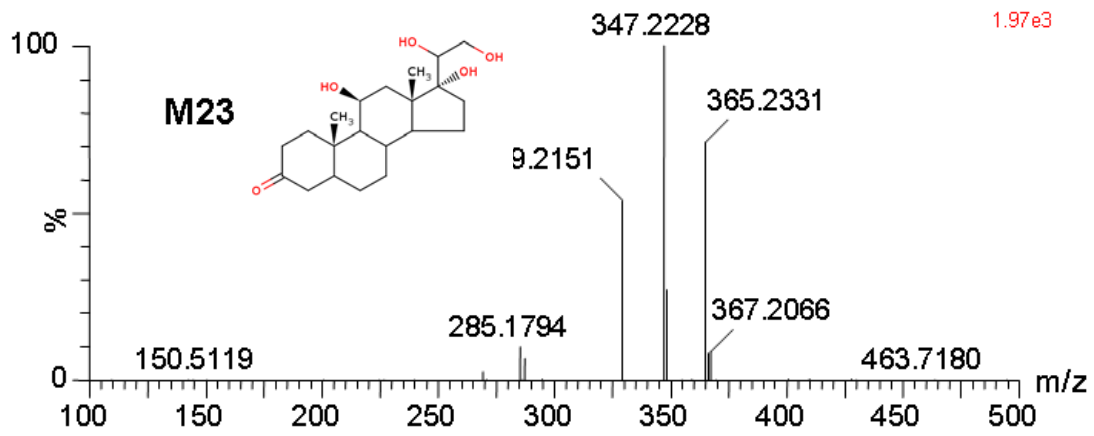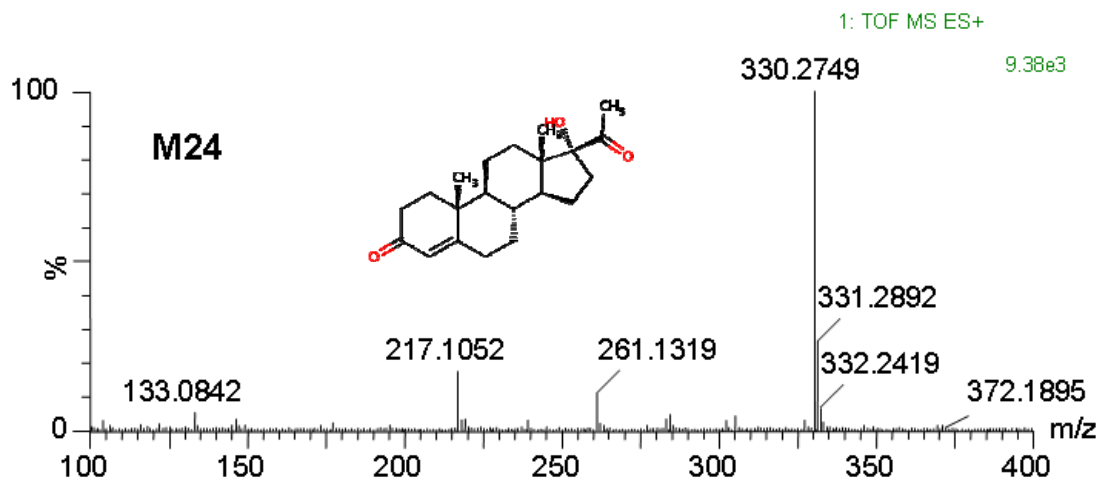

**Table S1 Result from Pathway Analysis with MetPA<sup>a</sup> from plasma**

---

|                                   | <b>Total</b> |                 |             |              |               |            |               |
|-----------------------------------|--------------|-----------------|-------------|--------------|---------------|------------|---------------|
| <b>Pathway Name</b>               | <b>Cmpd</b>  | <b>Expected</b> | <b>Hits</b> | <b>Raw p</b> | <b>Holm p</b> | <b>FDR</b> | <b>Impact</b> |
| Sphingolipid<br>metabolism        | 25           | 0.18695         | 3           | 7.2922E-4    | 0.048338      | 0.048338   | 0.14974       |
| Glycerophospholipid<br>metabolism | 39           | 0.29165         | 3           | 0.0027133    | 0.21435       | 0.10853    | 0.12549       |

---

<sup>a</sup>Total is the total number of compounds in the pathway; the hits is the actually matched number from the user uploaded data; the raw p is the original p value calculated from the enrichment analysis; the impact is the pathway impact value calculated from pathway topology analysis.

**Table S2 Result from Pathway Analysis with MetPA <sup>a</sup> from urine**

| <b>Pathway Name</b>               | <b>Total<br/>Cmpd</b> | <b>Expected</b> | <b>Hits</b> | <b>Raw p</b> | <b>Holm p</b> | <b>FDR</b> | <b>Impact</b> |
|-----------------------------------|-----------------------|-----------------|-------------|--------------|---------------|------------|---------------|
| Glycerophospholipid<br>metabolism | 39                    | 0.25924         | 4           | 9.3233E-5    | 0.0074587     | 0.0074587  | 0.18712       |
| Sphingolipid<br>metabolism        | 25                    | 0.16618         | 3           | 5.0737E-4    | 0.040082      | 0.020295   | 0.23081       |
| Steroid hormone<br>biosynthesis   | 99                    | 0.65808         | 3           | 0.025594     | 1.0           | 0.6825     | 0.12791       |

<sup>a</sup>Total is the total number of compounds in the pathway; the hits is the actually matched number from the user uploaded data; the raw p is the original p value calculated from the enrichment analysis; the impact is the pathway impact value calculated from pathway topology analysis.
